# Supplementary material for: Luminescence and luminescence quenching of highly efficient Y2Mo4O15:Eu3+ phosphors and ceramics
Source: PubMed Central journal article supplement (PMC4867634; doi:10.1038/srep26098), 2016-05-16
Supplement: srep26098-s1.pdf [file srep26098-s1.pdf]

## Supplementary Information

### Luminescence and luminescence quenching of highly efficient $\text{Y}_2\text{Mo}_4\text{O}_{15}:\text{Eu}^{3+}$ phosphors and ceramics

Matas Janulevicius<sup>a</sup>, Paulius Marmokas<sup>a</sup>, Martynas Misevicius<sup>b</sup>, Julija Grigorjevaite<sup>a</sup>,  
Lina Mikoliunaite<sup>c</sup>, Simas Sakirzanovas<sup>d,e</sup>, Arturas Katelnikovas<sup>a,\*</sup>

<sup>a</sup> Department of Analytical and Environmental Chemistry, Vilnius University, Naugarduko 24, LT-03225 Vilnius, Lithuania

<sup>b</sup> Department of Inorganic Chemistry, Vilnius University, Naugarduko 24, LT-03225 Vilnius, Lithuania

<sup>c</sup> Department of Physical Chemistry, Vilnius University, Naugarduko 24, LT-03225 Vilnius, Lithuania

<sup>d</sup> Department of Applied Chemistry, Vilnius University, Naugarduko 24, LT-03225 Vilnius, Lithuania

<sup>e</sup> Institute of Chemistry, Centre for Physical Sciences and Technology, A. Gostauto 9, LT-01108 Vilnius, Lithuania

\* Corresponding author: Tel: +370 697 23123; E-mail: arturas.katelnikovas@chf.vu.lt

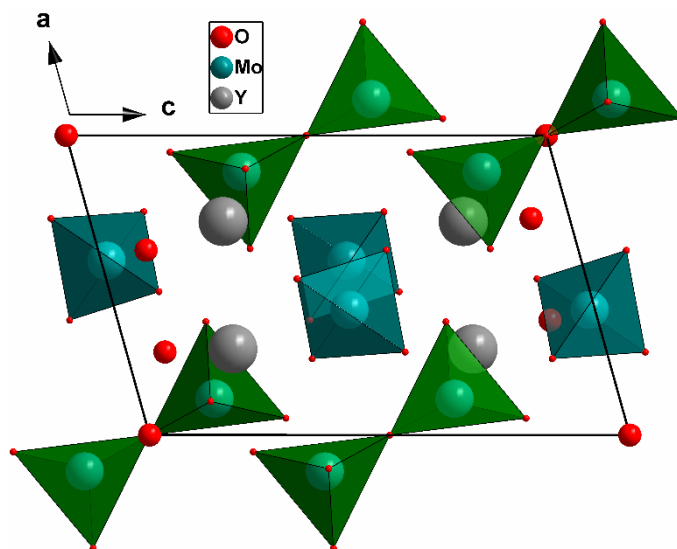

**Figure s1.** Unit cell of  $\text{Y}_2\text{Mo}_4\text{O}_{15}$  along the b-axis.

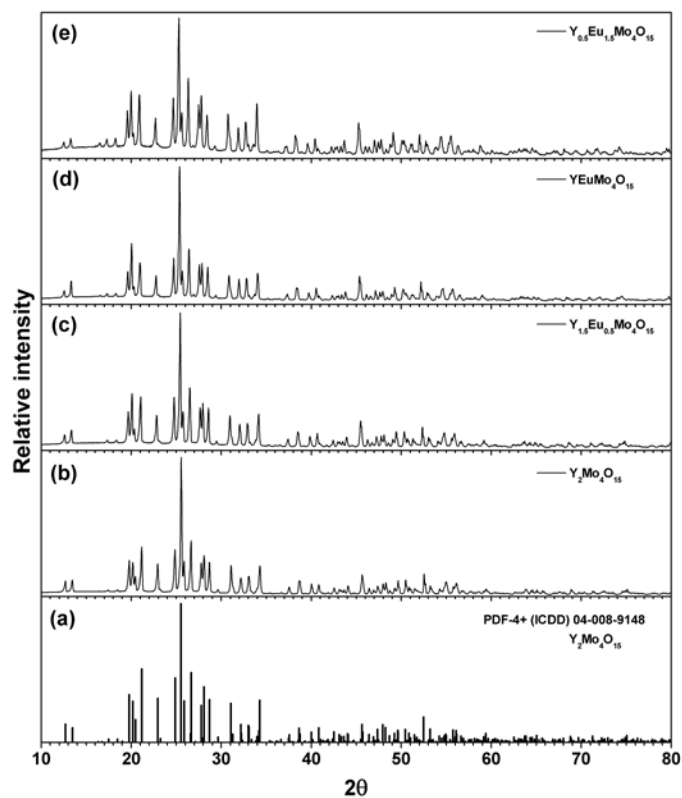

**Figure s2.** (a) XRD reference pattern of  $Y_2Mo_4O_{15}$ . Powder XRD diffraction patterns of  $Y_2Mo_4O_{15}:Eu^{3+}$  samples doped with (b) 0%  $Eu^{3+}$ , (c) 25%  $Eu^{3+}$ , (d) 50%  $Eu^{3+}$ , (e) 75%  $Eu^{3+}$ .

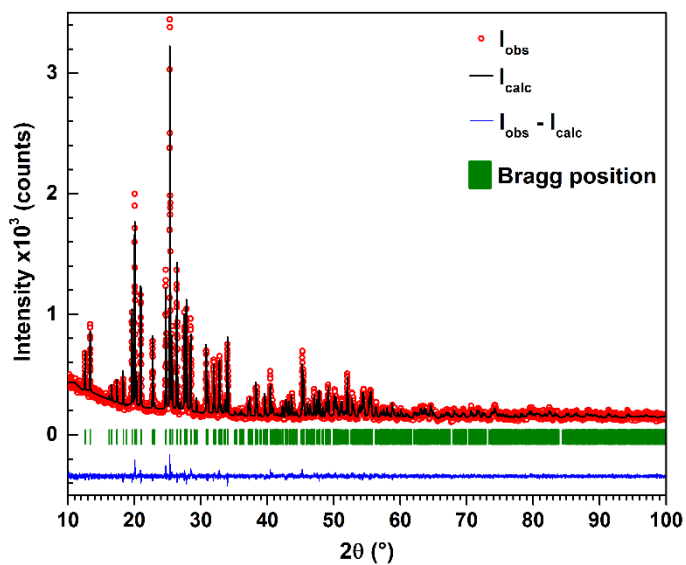

**Figure s3.** Rietveld refinement of  $Y_2Mo_4O_{15}:75\%Eu^{3+}$  powder XRD pattern.

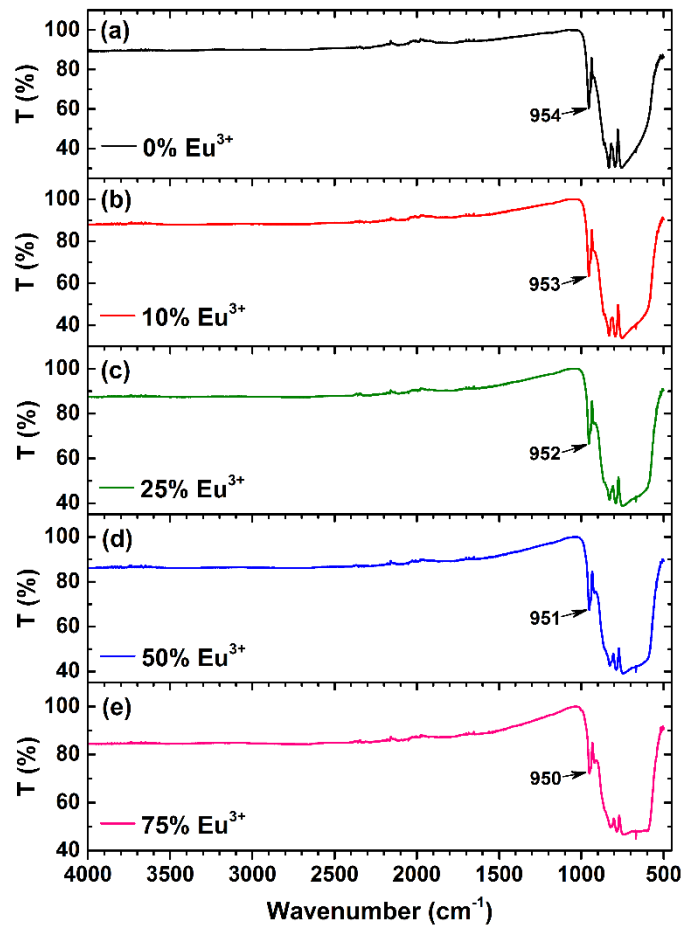

**Figure s4.** FTIR spectra of  $\text{Y}_2\text{Mo}_4\text{O}_{15}:\text{Eu}^{3+}$  doped with (a) 0%  $\text{Eu}^{3+}$ , (b) 10%  $\text{Eu}^{3+}$ , (c) 25%  $\text{Eu}^{3+}$ , (d) 50%  $\text{Eu}^{3+}$  and (e) 75%  $\text{Eu}^{3+}$ .

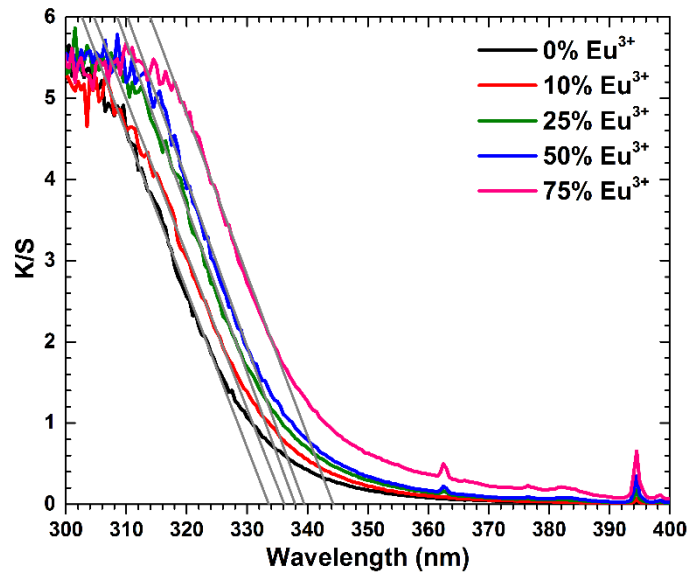

**Figure s5.** Absorption spectra of  $\text{Y}_2\text{Mo}_4\text{O}_{15}:\text{Eu}^{3+}$  as a function of  $\text{Eu}^{3+}$  concentration.

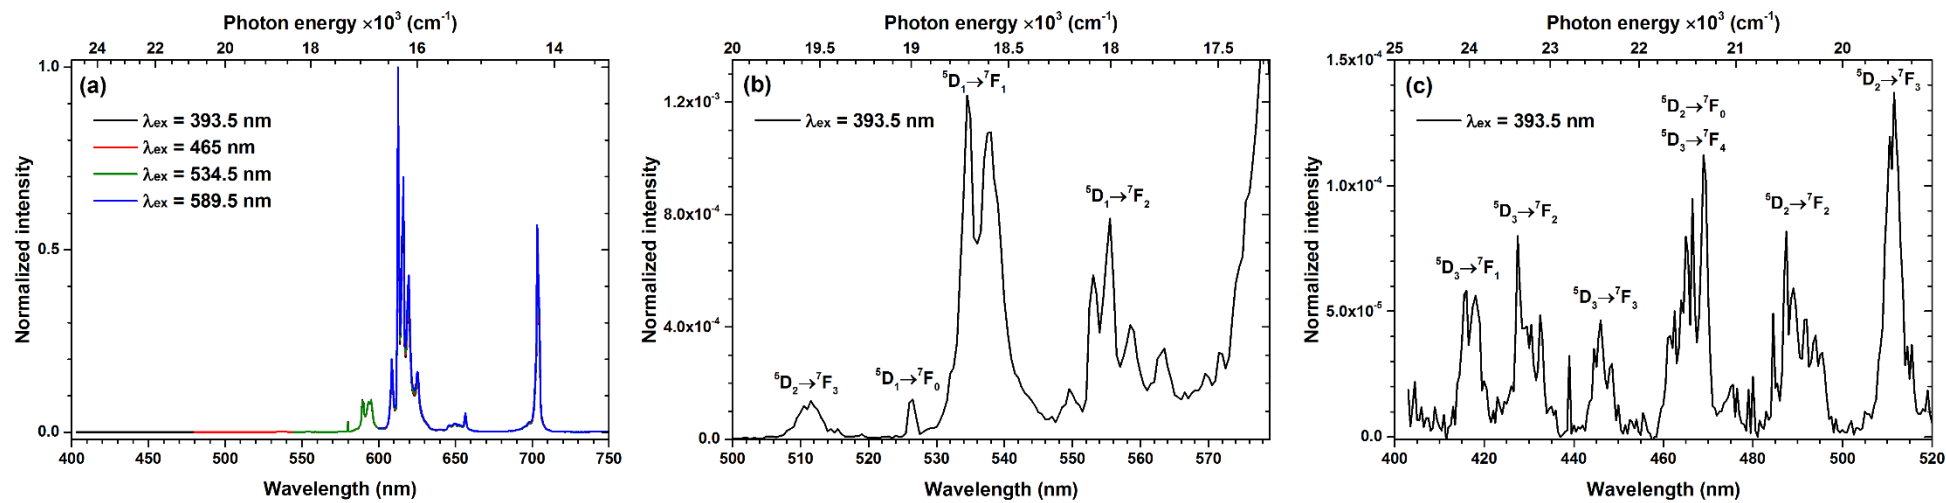

**Figure s6.** (a) Emission spectra of  $\text{Y}_2\text{Mo}_4\text{O}_{15}:50\%\text{Eu}^{3+}$  sample excited at different wavelengths; (b) and (c) magnified high energy regions of emission spectra ( $\lambda_{\text{ex}} = 393.5$  nm).

**Table s1.** Unit cell parameters of  $Y_2Mo_4O_{15}:Eu^{3+}$  derived from the Rietveld refinement of the powder XRD patterns.

| $Eu^{3+}$ (%) | a (Å)  | b (Å)  | c (Å)   | V (Å <sup>3</sup> ) | $\beta$ (°) |
|---------------|--------|--------|---------|---------------------|-------------|
| 0             | 6.8189 | 9.5787 | 10.5185 | 661.92              | 105.54      |
| 5             | 6.8213 | 9.5846 | 10.5232 | 662.82              | 105.55      |
| 10            | 6.8256 | 9.5908 | 10.5292 | 663.99              | 105.57      |
| 25            | 6.8371 | 9.6088 | 10.5452 | 667.22              | 105.61      |
| 50            | 6.8561 | 9.6404 | 10.5719 | 672.74              | 105.69      |
| 75            | 6.8786 | 9.6751 | 10.6033 | 679.15              | 105.75      |

**Table s2.** Photoluminescence decay values of  $Y_2Mo_4O_{15}:Eu^{3+}$  phosphors as a function of  $Eu^{3+}$  concentration and excitation wavelength ( $\lambda_{em} = 613$  nm).

| $Eu^{3+}$ (%) | $\lambda_{ex} = 290$ nm |                      | $\lambda_{ex} = 393.5$ nm |                      | $\lambda_{ex} = 465$ nm |                      |
|---------------|-------------------------|----------------------|---------------------------|----------------------|-------------------------|----------------------|
|               | $\tau$ ( $\mu$ s)       | Std. dev. ( $\mu$ s) | $\tau$ ( $\mu$ s)         | Std. dev. ( $\mu$ s) | $\tau$ ( $\mu$ s)       | Std. dev. ( $\mu$ s) |
| 1             | 837                     | 0.5                  | 816                       | 0.4                  | 807                     | 0.4                  |
| 5             | 836                     | 0.5                  | 813                       | 0.4                  | 812                     | 0.4                  |
| 10            | 836                     | 0.5                  | 808                       | 0.4                  | 806                     | 0.4                  |
| 25            | 804                     | 0.5                  | 784                       | 0.4                  | 785                     | 0.4                  |
| 50            | 734                     | 0.4                  | 727                       | 0.4                  | 727                     | 0.4                  |
| 75            | 592                     | 0.4                  | 601                       | 0.4                  | 600                     | 0.4                  |

**Table s3.** Temperature dependent photoluminescence decay ( $\lambda_{ex} = 393.5$  nm,  $\lambda_{em} = 613$  nm) values of  $Y_2Mo_4O_{15}:Eu^{3+}$  phosphors doped with 1%, 10% and 75%  $Eu^{3+}$ .

| T (K) | $Y_2Mo_4O_{15}:1\%Eu^{3+}$ |                      | $Y_2Mo_4O_{15}:10\%Eu^{3+}$ |                      | $Y_2Mo_4O_{15}:75\%Eu^{3+}$ |                      |
|-------|----------------------------|----------------------|-----------------------------|----------------------|-----------------------------|----------------------|
|       | $\tau$ ( $\mu$ s)          | Std. dev. ( $\mu$ s) | $\tau$ ( $\mu$ s)           | Std. dev. ( $\mu$ s) | $\tau$ ( $\mu$ s)           | Std. dev. ( $\mu$ s) |
| 77    | 837                        | 0.6                  | 828                         | 0.6                  | 697                         | 0.5                  |
| 100   | 835                        | 0.6                  | 825                         | 0.6                  | 657                         | 0.5                  |
| 150   | 830                        | 0.5                  | 820                         | 0.6                  | 605                         | 0.4                  |
| 200   | 824                        | 0.5                  | 815                         | 0.5                  | 584                         | 0.4                  |
| 250   | 819                        | 0.5                  | 809                         | 0.5                  | 583                         | 0.4                  |
| 300   | 812                        | 0.6                  | 801                         | 0.5                  | 597                         | 0.4                  |
| 350   | 802                        | 0.7                  | 796                         | 0.6                  | 618                         | 0.4                  |
| 400   | 796                        | 0.8                  | 787                         | 0.6                  | 615                         | 0.4                  |
| 450   | 783                        | 0.9                  | 769                         | 0.7                  | 524                         | 0.4                  |
| 500   | 758                        | 1.0                  | 734                         | 0.9                  | 486                         | 0.5                  |

**Table s4.** Colour coordinates (CIE 1931 and CIE 1976 colour space) and luminous efficacies (LE) of synthesized phosphors as a function of  $\text{Eu}^{3+}$  concentration and excitation wavelength.

| $\text{Eu}^{3+}$<br>(%) | $\lambda_{\text{ex}} = 290 \text{ nm}$ |        |          |        |                              | $\lambda_{\text{ex}} = 393.5 \text{ nm}$ |        |          |        |                              | $\lambda_{\text{ex}} = 465 \text{ nm}$ |        |          |        |                              |
|-------------------------|----------------------------------------|--------|----------|--------|------------------------------|------------------------------------------|--------|----------|--------|------------------------------|----------------------------------------|--------|----------|--------|------------------------------|
|                         | CIE 1931                               |        | CIE 1976 |        | LE<br>(lm/W <sub>opt</sub> ) | CIE 1931                                 |        | CIE 1976 |        | LE<br>(lm/W <sub>opt</sub> ) | CIE 1931                               |        | CIE 1976 |        | LE<br>(lm/W <sub>opt</sub> ) |
|                         | x                                      | y      | u'       | v'     |                              | x                                        | y      | u'       | v'     |                              | x                                      | y      | u'       | v'     |                              |
| <b>1</b>                | 0.6615                                 | 0.3379 | 0.4617   | 0.5306 | 237                          | 0.6656                                   | 0.3341 | 0.4689   | 0.5296 | 241                          | 0.6650                                 | 0.3347 | 0.4678   | 0.5297 | 241                          |
| <b>5</b>                | 0.6654                                 | 0.3342 | 0.4686   | 0.5296 | 243                          | 0.6656                                   | 0.3341 | 0.4689   | 0.5295 | 243                          | 0.6636                                 | 0.3356 | 0.4656   | 0.5299 | 243                          |
| <b>10</b>               | 0.6663                                 | 0.3334 | 0.4702   | 0.5294 | 242                          | 0.6661                                   | 0.3336 | 0.4699   | 0.5294 | 242                          | 0.6654                                 | 0.3341 | 0.4687   | 0.5296 | 242                          |
| <b>25</b>               | 0.6670                                 | 0.3327 | 0.4715   | 0.5292 | 240                          | 0.6665                                   | 0.3332 | 0.4705   | 0.5293 | 241                          | 0.6664                                 | 0.3332 | 0.4705   | 0.5293 | 242                          |
| <b>50</b>               | 0.6672                                 | 0.3325 | 0.4719   | 0.5291 | 239                          | 0.6669                                   | 0.3328 | 0.4713   | 0.5292 | 241                          | 0.6671                                 | 0.3327 | 0.4716   | 0.5292 | 241                          |
| <b>75</b>               | 0.6672                                 | 0.3326 | 0.4718   | 0.5292 | 239                          | 0.6668                                   | 0.3329 | 0.4711   | 0.5293 | 241                          | 0.6669                                 | 0.3328 | 0.4713   | 0.5292 | 241                          |

**Table s5.** Colour coordinates (CIE 1931 and CIE 1976 colour space) and luminous efficacies (LE) of synthesized phosphors as a function of  $\text{Eu}^{3+}$  concentration and temperature ( $\lambda_{\text{ex}} = 393.5 \text{ nm}$ ).

| T<br>(K)   | $\text{Y}_2\text{Mo}_4\text{O}_{15}:1\%\text{Eu}^{3+}$ |        |          |        |                              | $\text{Y}_2\text{Mo}_4\text{O}_{15}:10\%\text{Eu}^{3+}$ |        |          |        |                              | $\text{Y}_2\text{Mo}_4\text{O}_{15}:75\%\text{Eu}^{3+}$ |        |          |        |                              |
|------------|--------------------------------------------------------|--------|----------|--------|------------------------------|---------------------------------------------------------|--------|----------|--------|------------------------------|---------------------------------------------------------|--------|----------|--------|------------------------------|
|            | CIE 1931                                               |        | CIE 1976 |        | LE<br>(lm/W <sub>opt</sub> ) | CIE 1931                                                |        | CIE 1976 |        | LE<br>(lm/W <sub>opt</sub> ) | CIE 1931                                                |        | CIE 1976 |        | LE<br>(lm/W <sub>opt</sub> ) |
|            | x                                                      | y      | u'       | v'     |                              | x                                                       | y      | u'       | v'     |                              | x                                                       | y      | u'       | v'     |                              |
| <b>77</b>  | 0.6642                                                 | 0.3351 | 0.4667   | 0.5298 | 231                          | 0.6665                                                  | 0.3331 | 0.4707   | 0.5293 | 231                          | 0.6677                                                  | 0.3320 | 0.4729   | 0.5290 | 229                          |
| <b>100</b> | 0.6651                                                 | 0.3343 | 0.4682   | 0.5296 | 231                          | 0.6674                                                  | 0.3322 | 0.4724   | 0.5290 | 231                          | 0.6684                                                  | 0.3313 | 0.4741   | 0.5288 | 229                          |
| <b>150</b> | 0.6646                                                 | 0.3348 | 0.4674   | 0.5297 | 231                          | 0.6669                                                  | 0.3328 | 0.4713   | 0.5292 | 231                          | 0.6678                                                  | 0.3320 | 0.4729   | 0.5290 | 229                          |
| <b>200</b> | 0.6642                                                 | 0.3353 | 0.4666   | 0.5299 | 232                          | 0.6667                                                  | 0.3330 | 0.4710   | 0.5292 | 231                          | 0.6676                                                  | 0.3321 | 0.4727   | 0.5290 | 231                          |
| <b>250</b> | 0.6641                                                 | 0.3354 | 0.4664   | 0.5299 | 234                          | 0.6667                                                  | 0.3330 | 0.4709   | 0.5293 | 231                          | 0.6675                                                  | 0.3323 | 0.4724   | 0.5291 | 231                          |
| <b>300</b> | 0.6639                                                 | 0.3356 | 0.4659   | 0.5300 | 234                          | 0.6666                                                  | 0.3331 | 0.4708   | 0.5293 | 232                          | 0.6672                                                  | 0.3325 | 0.4719   | 0.5291 | 232                          |
| <b>350</b> | 0.6632                                                 | 0.3363 | 0.4647   | 0.5302 | 237                          | 0.6663                                                  | 0.3334 | 0.4701   | 0.5294 | 233                          | 0.6667                                                  | 0.3331 | 0.4709   | 0.5293 | 233                          |
| <b>400</b> | 0.6613                                                 | 0.3382 | 0.4612   | 0.5307 | 237                          | 0.6651                                                  | 0.3346 | 0.4680   | 0.5297 | 235                          | 0.6654                                                  | 0.3343 | 0.4685   | 0.5296 | 234                          |
| <b>450</b> | 0.6578                                                 | 0.3415 | 0.4550   | 0.5315 | 243                          | 0.6628                                                  | 0.3368 | 0.4639   | 0.5303 | 238                          | 0.6636                                                  | 0.3361 | 0.4652   | 0.5301 | 237                          |
| <b>500</b> | 0.6527                                                 | 0.3464 | 0.4462   | 0.5328 | 247                          | 0.6603                                                  | 0.3392 | 0.4594   | 0.5309 | 240                          | 0.6611                                                  | 0.3385 | 0.4607   | 0.5308 | 241                          |

**Table s6.** Colour coordinates (CIE 1931 and CIE 1976 colour space) and luminous efficacies (LE) of different thickness  $\text{Y}_2\text{Mo}_4\text{O}_{15}:75\%\text{Eu}^{3+}$  ceramics mounted on 375, 400, and 455 nm LEDs.

| Thickness<br>(mm) | LED<br>(nm) | CIE 1931 |        | CIE 1976 |        | LE<br>(lm/W <sub>opt</sub> ) |
|-------------------|-------------|----------|--------|----------|--------|------------------------------|
|                   |             | x        | y      | u'       | v'     |                              |
| 0.71              | 375         | 0.6526   | 0.3357 | 0.4561   | 0.5279 | 200                          |
|                   | 400         | 0.6226   | 0.3181 | 0.4470   | 0.5138 | 187                          |
|                   | 455         | 0.2007   | 0.0791 | 0.2264   | 0.2006 | 94                           |
| 0.98              | 375         | 0.6582   | 0.3352 | 0.4614   | 0.5287 | 189                          |
|                   | 400         | 0.6396   | 0.3248 | 0.4554   | 0.5203 | 184                          |
|                   | 455         | 0.2641   | 0.1217 | 0.2686   | 0.2785 | 121                          |
